# Supplementary material
Source: publisher site journal article supplement (https://www.dovepress.com/article/579301)
Supplement: Supplementary file 1 [file 579301_Supplementary%20Information.docx]

**Supplementary Information**


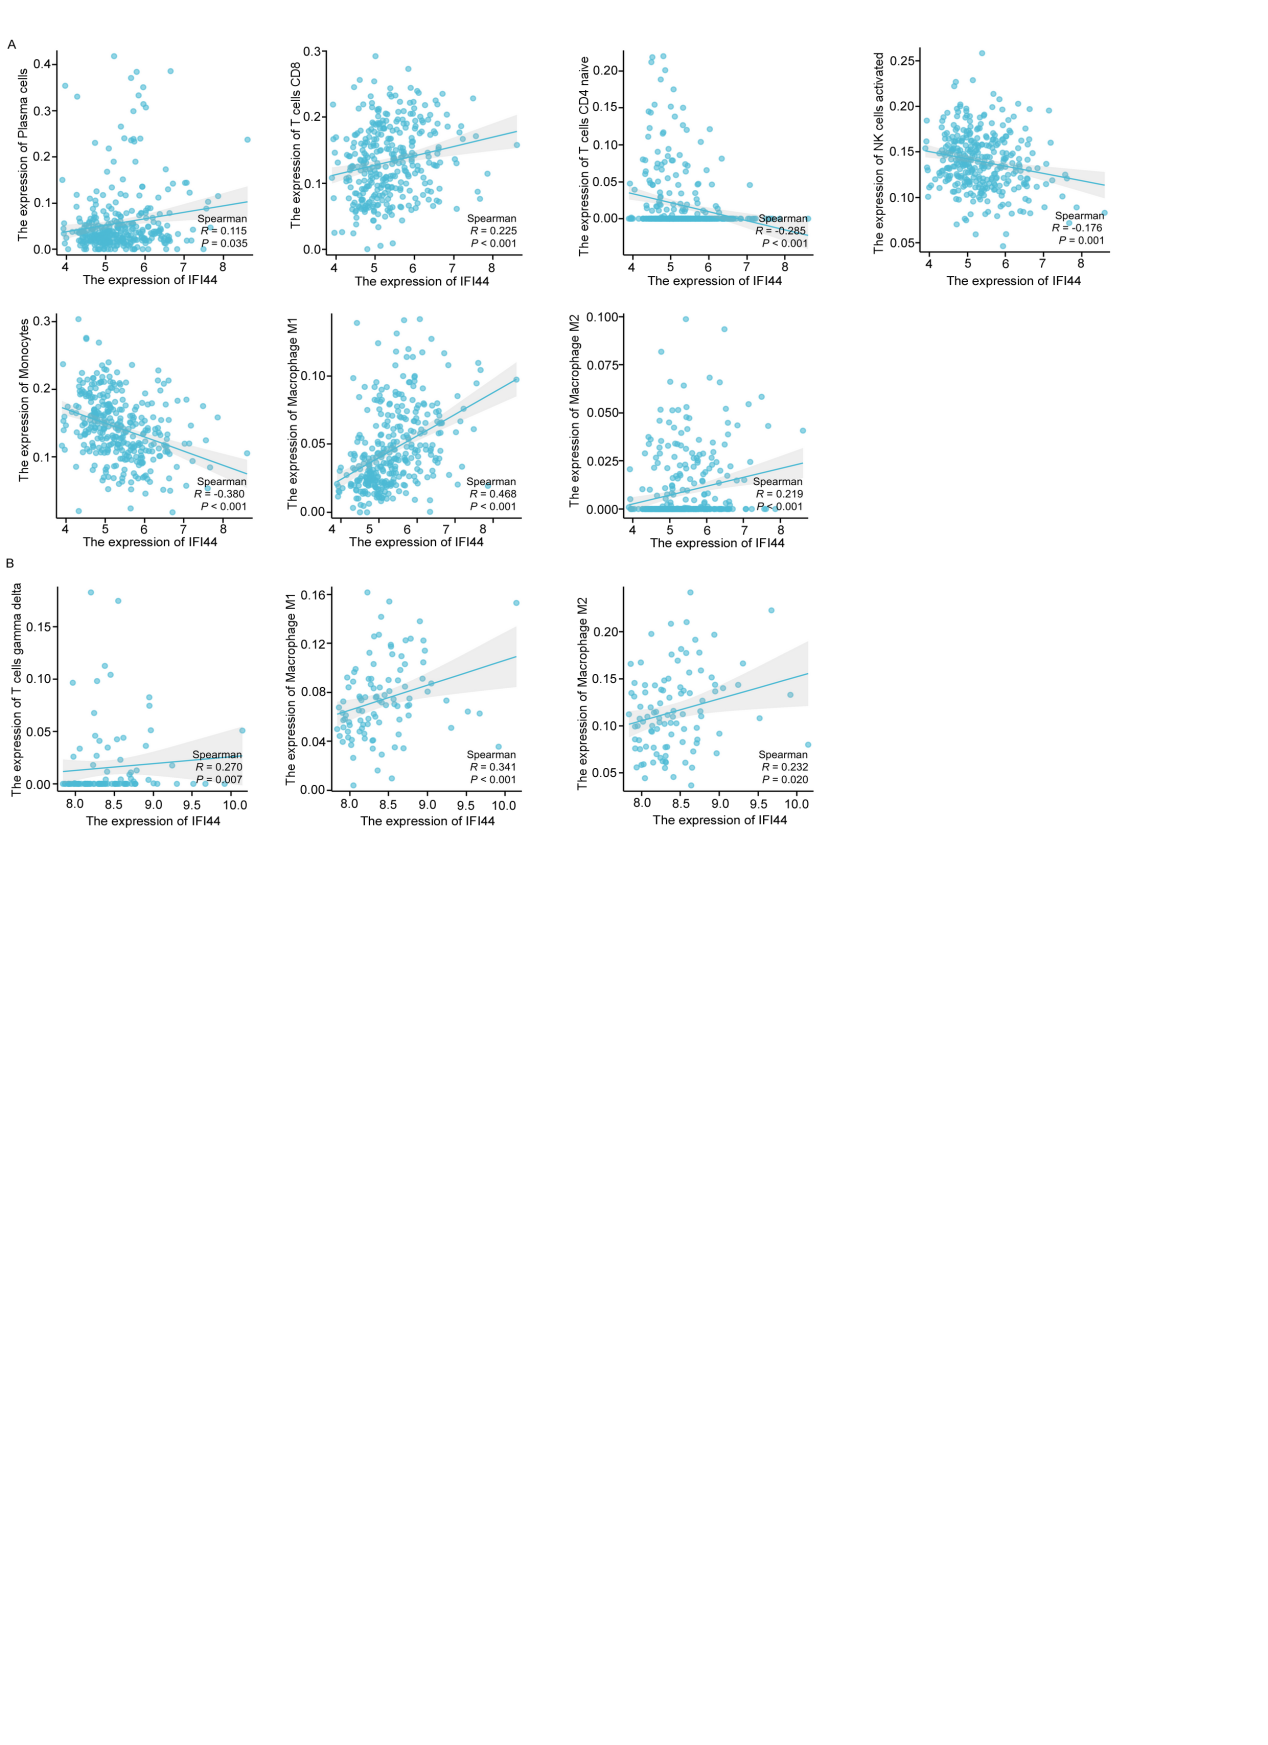


**Supplementary Figure. 1 Spearman correlation tests between IFI44 expression and each significant immune cell type's infiltration score in both the GSE47994 and GSE36772 cohorts.(related to figure 2)**

(A) The correlation between IFI44 expression and immune cells in GSE47994. (B) The correlation between IFI44 expression and immune cells in GSE36772.
